# Supplementary material for: Unveiling the Nexus: Cellular Metabolomics Unravels the Impact of Estrogen on Nicotinamide Metabolism in Mitigating Rheumatoid Arthritis Pathogenesis
Source: MDPI journal article supplement (doi:10.3390/metabo14040214), 2024-04-11
Supplement: s1 [file s1]

SUPPLEMENTARY FILE

# Unveiling the Nexus: Cellular Metabolomics Unravels the Impact of Estrogen on Nicotinamide Metabolism in Mitigating Rheumatoid Arthritis Pathogenesis

Swati Malik <sup>1,2</sup>, Debolina Chakraborty <sup>1,2</sup>, Prachi Agnihotri <sup>1,2</sup>, Vijay Kumar <sup>3</sup>  
and Sagarika Biswas <sup>1,2,\*</sup>

<sup>1</sup> Department of Integrative and Functional Biology, CSIR- Institute of Genomics and Integrative Biology, Mall Road, Delhi 110007, India; swati.malik@igib.res.in (S.M.); debolina@igib.res.in (D.C.); prachi.igib22a@acsir.res.in (P.A.)

<sup>2</sup> AcSIR- Academy of Scientific and Innovative Research, Ghaziabad 201002, India

<sup>3</sup> Department of Orthopaedics, AIIMS- All India Institute of Medical Sciences, Ansari Nagar, New Delhi 110029, India; vkgene@aiims.edu

\* Correspondence: sagarika.biswas@igib.res.in or sagarika.zollu@gmail.com;  
Tel.: +91-11-27662581

**Table S1.** The clinical demography characteristics of patients with RA

| S. No. | Patient's characteristics | RA patient (n=6) |
|--------|---------------------------|------------------|
| 1      | Age (yrs.)                | 55± 10           |
| 2      | Sex (Female, Male)        | F                |
| 3      | ESR (mm/hr)               | 35 ± 5           |
| 4      | RF (+ve/-ve)              | +ve              |
| 5      | CRP (mg/L)                | 80±15            |
| 6      | Tender Joint              | 20±6             |
| 7      | Swollen joints            | 10±4             |
| 8      | DAS-28 score              | 6 ± 0.5          |
| 9      | Disease duration yrs.     | 15 ± 5           |
| 10     | Medication (Yes/No)       | Yes              |

\*RA: Rheumatoid arthritis; ESR: Erythrocyte sedimentation rate; RF: Rheumatoid factor; CRP: C-reactive protein; DAS-28: Disease Activity Score-28. The values are expressed as Mean ±SD

**Table S2:** Primer Name and Sequence

| S.no. | Primer | Forward                       | Reverse                            |
|-------|--------|-------------------------------|------------------------------------|
| 1.    | STAT1  | 5' TGACTTCCATGCGGTTGAAC<br>3' | 5' TCCTTTGGCCTGGAGTAATACT<br>3'    |
| 2.    | MMP3   | 5' CACTGGGATAGGAGGGGATG<br>3' | 5' TCTGTGGGTGCCATTTCTGT 3'         |
| 3.    | MMP9   | 5' TGCGTGGAGAGTCGAAATCT<br>3' | 5' GGTGATGTTGTGGTGGTGC             |
| 4.    | MAPK14 | 5' CCCGAGCGTTACCAGAACC<br>3'  | 5'<br>TCGCATGAATGATGGACTGAAT<br>3' |

**Table S3:** The significant metabolic pathways of 109 annotated metabolites from KEGG pathway library analysed by MetaboAnalyst software

| S.no. | Pathway Name                                        | p-value |
|-------|-----------------------------------------------------|---------|
| 1.    | Phenylalanine, tyrosine and tryptophan biosynthesis | 0.001   |
| 2.    | Valine, leucine and isoleucine biosynthesis         | 0.00452 |
| 3.    | Phenylalanine metabolism                            | 0.00452 |
| 4.    | Glutathione metabolism                              | 0.0054  |
| 5.    | Arginine biosynthesis                               | 0.014   |
| 6.    | Nicotinate and nicotinamide metabolism              | 0.01602 |
| 7.    | Pantothenate and CoA biosynthesis                   | 0.02785 |

**Table S4:** The 8 significant metabolites based on the p-value detailing the m/z value, Fold change and HMDB ID

| S.no. | m/z      | HMDB ID     | Metabolite Name                          | Fold change | p-value  |
|-------|----------|-------------|------------------------------------------|-------------|----------|
| 1.    | 512.3068 | HMDB0010379 | LPC 14:0                                 | 0.689485    | 0.000623 |
| 2.    | 137.0705 | HMDB0000699 | 1-Methylnicotinamide                     | 1.627562    | 0.00547  |
| 3.    | 169.0633 | HMDB0001112 | Glyceraldehyde, 3-(dihydrogen phosphate) | 1.678601    | 0.00728  |
| 4.    | 277.0928 | HMDB0030791 | Dihydromethysticin                       | 1.419794    | 0.00763  |
| 5.    | 381.2486 | HMDB0253945 | Lactobionic acid                         | 1.970484    | 0.011718 |
| 6.    | 664.1139 | HMDB0000902 | beta-Nicotinamide adenine dinucleotide   | 1.188219    | 0.021411 |
| 7.    | 305.9473 | HMDB0029093 | Trp-Thr                                  | 1.67495     | 0.031722 |
| 8.    | 248.0668 | HMDB0032983 | 1-hydroxy-10-methylacridone              | 1.736537    | 0.049748 |

**Table S5:** The significant metabolic pathways of 8 significant metabolites from KEGG pathway library analysed by MetaboAnalyst software

| S.no. | Pathway Name                           | p-Value  |
|-------|----------------------------------------|----------|
| 1.    | Nicotinate and nicotinamide metabolism | 2.53E-04 |
| 2.    | Fructose and mannose metabolism        | 0.037637 |
| 3.    | Pentose phosphate pathway              | 0.0432   |
| 4.    | Glycolysis / Gluconeogenesis           | 0.048741 |
| 5.    | Inositol phosphate metabolism          | 0.056096 |

**Table S6:** The matched common proteins obtained from Pharmmapper targets of metabolite 1-methylnicotinamide and RA associated gene targets with their GDA score

| S.no. | Gene   | Gene ID | UniProt | Gene Full Name                                     | GDA Score |
|-------|--------|---------|---------|----------------------------------------------------|-----------|
| 1     | STAT1  | 6772    | P42224  | signal transducer and activator of transcription 1 | 0.4       |
| 2     | MAPK14 | 1432    | Q16539  | mitogen-activated protein kinase 14                | 0.1       |
| 3     | MMP3   | 4314    | P08254  | matrix metalloproteinase 3                         | 0.1       |
| 4     | MMP9   | 4318    | P14780  | matrix metalloproteinase 9                         | 0.1       |
| 5     | PARP1  | 142     | P09874  | Poly (ADP-ribose) polymerase 1                     | 0.09      |
| 6     | MMP8   | 4317    | P22894  | matrix metalloproteinase 8                         | 0.08      |
| 7     | CASP1  | 834     | P29466  | caspase 1                                          | 0.07      |
| 8     | GSTM2  | 2946    | P28161  | glutathione S-transferase mu 2                     | 0.05      |
| 9     | DPEP1  | 1800    | P16444  | dipeptidase 1                                      | 0.03      |
| 10    | CDK2   | 1017    | P24941  | cyclin dependent kinase 2                          | 0.02      |
| 11    | GSK3B  | 2932    | P49841  | glycogen synthase kinase 3 beta                    | 0.02      |
| 12    | INSR   | 3643    | P06213  | insulin receptor                                   | 0.02      |
| 13    | PDPK1  | 5170    | O15530  | 3-phosphoinositide dependent protein kinase 1      | 0.01      |
| 14    | PDE4D  | 5144    | Q08499  | phosphodiesterase 4D                               | 0.01      |
| 15    | LCK    | 3932    | P06239  | LCK proto-oncogene, Src family tyrosine kinase     | 0.01      |
| 16    | TGFB2  | 7042    | P61812  | transforming growth factor beta 2                  | 0.01      |
| 17    | XIAP   | 331     | P98170  | X-linked inhibitor of apoptosis                    | 0.01      |
| 18    | F10    | 2159    | P00742  | coagulation factor X                               | 0.01      |
| 19    | EIF4E  | 1977    | P06730  | eukaryotic translation initiation factor 4E        | 0.01      |

**Table S7:** The gene targets associated with 1-methylnicotinamide (1-MNA) obtained from Pharmmapper database (**In excel file**)

**Table S8:** The Gene Ontology (GO) analysis depicting the 186 entries of Biological process associated with obtained 19 common gene targets of 1-methylnicotinamide and Rheumatoid arthritis pathogenesis (**In excel file**)

**Table S9:** The Gene Ontology (GO) analysis depicting the 14 entries of Molecular functions associated with obtained 19 common gene targets of 1-methylnicotinamide and Rheumatoid arthritis pathogenesis (**In excel file**)

**Table S10:** The KEGG pathways associated with 19 common gene targets of 1-methylnicotinamide and Rheumatoid arthritis pathogenesis (**In excel file**)

**Tabel S11:** The Reactome pathways associated with 19 common gene targets of 1-methylnicotinamide and Rheumatoid arthritis pathogenesis (**In excel file**)
